# Supplementary material for: Synthesis and characterization of cyclo-pentazolate salts of iron(iii) and aluminum(iii)
Source: Royal Society of Chemistry journal article supplement (doi:10.1039/d2ce01270g), 2022-01-01
Supplement: d2ce01270g1.pdf [file d2ce01270g1.pdf]

## Supporting Information

### Synthesis and Characterization of *cyclo*-Pentazolate Salts of Iron(III) and aluminum(III)

*Lei Chen<sup>a</sup>, Chen Yang<sup>b</sup>, Haoran Hu<sup>a</sup>, Lei Shi<sup>a</sup>, Chong Zhang<sup>a</sup>, Chengguo Sun<sup>ac</sup>, Chao Gao<sup>a</sup>, Yang Du<sup>\*a</sup> and Bingcheng Hu<sup>\*a</sup>*

<sup>a</sup>School of Chemical Engineering, Nanjing University of Science and Technology, Nanjing, Jiangsu 210094, China

<sup>b</sup>Hu Bei Sanjiang Aerospace Jianghe Chemical Technology Co., Ltd

<sup>c</sup>School of Chemical Engineering, University of Science and Technology Liaoning, Anshan, Liaoning 114051, China

\*Corresponding authors: [hube@njjust.edu.cn](mailto:hube@njjust.edu.cn); [duy@njjust.edu.cn](mailto:duy@njjust.edu.cn)

|                                        |           |
|----------------------------------------|-----------|
| <b>1. EXPERIMENTAL SECTION</b> .....   | <b>2</b>  |
| <b>2. CRYSTAL STRUCTURE DATA</b> ..... | <b>2</b>  |
| <b>3. IR SPECTRA</b> .....             | <b>8</b>  |
| <b>4. THERMAL ANALYSIS</b> .....       | <b>9</b>  |
| <b>5. MASS SPECTRA</b> .....           | <b>10</b> |

## 1. Experimental section

### General methods

All chemicals from commercial sources were analytical grade and used as received without further purification. Thermal property measurements were obtained on DSC (NETZSCH STA 449F5) at a scan rate of 5 °C min<sup>-1</sup> in closed Al containers with an argon flow of 50 mL min<sup>-1</sup>. FT-IR spectra were recorded on a Thermo Nicolet IS10 instrument. Electrospray ionization (ESI) mass spectra were recorded on a Finnigan TSQ Quantum ultra AM mass spectrometer. Elemental analyses were performed on a vario EL III CHNOS elemental analyzer.

### 2. Crystal structure data

The crystal data of **1** and **2** were collected with a Bruker APEX-II CCD single-crystal diffractometer and a Bruker D8 VENTURE single-crystal diffractometer at 150–193 K. The crystals were irradiated using MoK $\alpha$  radiation ( $\lambda = 0.71073$  nm). The structures were solved by intrinsic using SHELXT2014 and refinement was carried out by a full-matrix least-squares technique using SHELXT2018 program contained in OLEX2 suite.<sup>1-3</sup> The non-hydrogen atoms were identified by SHELXT program directly and refined anisotropically. The hydrogen atoms were located from difference Fourier map inspection and freely refined with Uiso(H) = 1.5Ueq (N, O). The Relevant crystal data and refinement results are summarized in **Table S1-S9**.

**Table S1.** Crystal data and structure refinement for compounds **1** and **2**.

| Compound                                          | 1                                                                                   | 2                                                                                   |
|---------------------------------------------------|-------------------------------------------------------------------------------------|-------------------------------------------------------------------------------------|
| CCDC No.                                          | 2207237                                                                             | 2207238                                                                             |
| Empirical formula                                 | Fe(H <sub>2</sub> O) <sub>6</sub> (N <sub>5</sub> ) <sub>3</sub> ·9H <sub>2</sub> O | Al(H <sub>2</sub> O) <sub>6</sub> (N <sub>5</sub> ) <sub>3</sub> ·9H <sub>2</sub> O |
| Formula weight                                    | 536.24                                                                              | 507.37                                                                              |
| Temperature (K)                                   | 193                                                                                 | 150                                                                                 |
| Wavelength (Å)                                    | 0.71073                                                                             | 0.71073                                                                             |
| Crystal system                                    | Monoclinic                                                                          | Monoclinic                                                                          |
| Space group                                       | <i>P2<sub>1</sub>/n</i>                                                             | <i>P2<sub>1</sub>/n</i>                                                             |
| <i>a</i> (Å)                                      | 16.8316(4)                                                                          | 16.7321(8)                                                                          |
| <i>b</i> (Å)                                      | 14.7115(4)                                                                          | 14.5671(6)                                                                          |
| <i>c</i> (Å)                                      | 20.1791(6)                                                                          | 20.0005(7)                                                                          |
| $\alpha$ (°)                                      | 90                                                                                  | 90                                                                                  |
| $\beta$ (°)                                       | 93.400(1)                                                                           | 92.771(2)                                                                           |
| $\gamma$ (°)                                      | 90                                                                                  | 90                                                                                  |
| Volume (Å <sup>3</sup> )                          | 4987.9(2)                                                                           | 4869.2(4)                                                                           |
| <i>Z</i>                                          | 8                                                                                   | 8                                                                                   |
| Density (g·cm <sup>-3</sup> )                     | 1.428                                                                               | 1.384                                                                               |
| $\mu$ (mm <sup>-1</sup> )                         | 0.688                                                                               | 0.169                                                                               |
| F(000)                                            | 2248.0                                                                              | 2144.0                                                                              |
| Crystal size (mm <sup>3</sup> )                   | 0.12 x 0.13 x 0.15                                                                  | 0.13 × 0.12 × 0.11                                                                  |
| Theta range for data collection                   | 2.065 to 27.496                                                                     | 4.176 to 50.014                                                                     |
|                                                   | -21<= <i>h</i> <=20                                                                 | -19<= <i>h</i> <=19                                                                 |
| Index ranges                                      | -19<= <i>k</i> <=16                                                                 | -17<= <i>k</i> <=17                                                                 |
|                                                   | -25<= <i>l</i> <=26                                                                 | -23<= <i>l</i> <=22                                                                 |
| Reflections collected                             | 56395                                                                               | 75466                                                                               |
| Independent reflections                           | 11374 [R(int) = 0.045]                                                              | 8507 [R(int) = 0.068]                                                               |
| Data/restraints/parameters                        | 11374/10/645                                                                        | 8507/0/559                                                                          |
| Goodness-of-fit on F <sup>2</sup>                 | 1.019                                                                               | 1.080                                                                               |
| Final R indices [I>2sigma(I)]                     | R1 = 0.0420                                                                         | R1 = 0.0599                                                                         |
|                                                   | wR2 = 0.1167                                                                        | wR2 = 0.1426                                                                        |
| R indices (all data)                              | R1 = 0.0700                                                                         | R1 = 0.0904                                                                         |
|                                                   | wR2 = 0.1375                                                                        | wR2 = 0.1611                                                                        |
| Largest diff. peak and hole (e. Å <sup>-3</sup> ) | 0.571 and -0.543                                                                    | 0.428 and -0.334                                                                    |

**Table S2. Bond lengths for 1.**

| Parameter | Bond length (Å) | Parameter | Bond length (Å) |
|-----------|-----------------|-----------|-----------------|
| Fe1-O1    | 1.9790(2)       | N1-N2     | 1.317(3)        |
| Fe1-O2    | 1.9819(2)       | N1-N5     | 1.314(4)        |
| Fe1-O3    | 2.0134(2)       | N3-N2     | 1.308(4)        |
| Fe1-O4    | 1.9895(2)       | N3-N4     | 1.318(4)        |
| Fe1-O5    | 1.963(2)        | N4-N5     | 1.312(4)        |
| Fe1-O6    | 1.986(2)        | N14-N15   | 1.306(3)        |
| Fe2-O10   | 1.9933(2)       | N11-N15   | 1.330(2)        |
| Fe2-O11   | 1.9835(2)       | N11-N12   | 1.317(3)        |
| Fe2-O12   | 1.9836(2)       | N13-N12   | 1.317(3)        |
| Fe2-O8    | 1.983(2)        | N13-N14   | 1.320(3)        |
| Fe2-O9    | 1.9627(2)       | O14-H14A  | 0.8700          |
| Fe2-O7    | 2.0190(2)       | O14-H14B  | 0.8700          |

**Table S3. Bond angles for 1.**

| Parameter     | Bond angle (°) | Parameter   | Bond angle (°) |
|---------------|----------------|-------------|----------------|
| O1-Fe1-O2     | 90.32(8)       | N2-N1-N5    | 108.0(2)       |
| O1-Fe1-O3     | 178.65(8)      | N1-N2-N3    | 108.0(2)       |
| O1-Fe1-O4     | 92.33(8)       | N2-N3-N4    | 108.0(2)       |
| O1-Fe1-O5     | 89.18(8)       | N3-N4-N5    | 107.8(3)       |
| O1-Fe1-O6     | 88.41(7)       | N1-N5-N4    | 108.1(2)       |
| O7-Fe2-O8     | 90.57(7)       | N11-N15-N14 | 108.37(18)     |
| O7-Fe2-O9     | 91.48(8)       | N13-N14-N15 | 107.8(2)       |
| O7-Fe2-O10    | 88.85(7)       | N12-N13-N14 | 108.4(2)       |
| O7-Fe2-O11    | 178.55(8)      | N11-N12-N13 | 107.86(16)     |
| O7-Fe2-O12    | 88.94(7)       | N12-N11-N15 | 107.56(17)     |
| H12A-O12-H12B | 105.00         | N22-N21-N25 | 107.4(3)       |
| H11A-O11-H11B | 104.00         | N21-N22-N23 | 108.0(2)       |

|              |        |             |          |
|--------------|--------|-------------|----------|
| Fe2-O12-H12B | 128.00 | N22-N23-N24 | 108.2(2) |
|--------------|--------|-------------|----------|

**Table S4.** Torsion angles for **1**.

| Parameter       | Torsion angle (°) | Parameter       | Torsion angle (°) |
|-----------------|-------------------|-----------------|-------------------|
| N5-N1-N2-N3     | -0.3(3)           | N11-N12-N13-N14 | 0.6(3)            |
| N2-N1-N5-N4     | 0.2(3)            | N12-N13-N14-N15 | -0.4(3)           |
| N1-N2-N3-N4     | 0.2(3)            | N25-N21-N22-N23 | -0.3(3)           |
| N2-N3-N4-N5     | -0.1(3)           | N22-N21-N25-N24 | 0.2(4)            |
| N15-N11-N12-N13 | -0.5(2)           | N21-N22-N23-N24 | 0.3(3)            |
| N12-N11-N15-N14 | 0.3(3)            | N22-N23-N24-N25 | -0.2(3)           |

**Table S5.** Hydrogen bonds for **1**.

| D-H...A        | D-H (Å) | H...A (Å) | D...A (Å) | D-H...A (°) |
|----------------|---------|-----------|-----------|-------------|
| O1-H1A...O15   | 0.8700  | 1.7200    | 2.559(3)  | 161         |
| O1-H1B...N26   | 0.8700  | 1.8800    | 2.727(3)  | 163         |
| O2-H2A...O16   | 0.8700  | 1.7500    | 2.615(3)  | 175         |
| O2-H2B...O23   | 0.8700  | 1.7600    | 2.625(3)  | 178         |
| O3-H3A...N15   | 0.8700  | 1.9300    | 2.742(2)  | 155         |
| O3-H3B...N29   | 0.8700  | 1.9500    | 2.760(3)  | 154         |
| O20-H20B...N23 | 0.8700  | 1.9900    | 2.847(3)  | 170         |
| O21-H21A...N5  | 0.8700  | 1.9500    | 2.817(3)  | 178         |
| O23-H23B...N20 | 0.8700  | 1.9900    | 2.850(3)  | 172         |
| O28-H28A...N24 | 0.8700  | 2.0500    | 2.830(4)  | 149         |
| O28-H28B...N6  | 0.8700  | 2.0600    | 2.883(4)  | 159         |
| O29-H29A...N16 | 0.8700  | 2.0000    | 2.841(4)  | 161         |
| O30-H30B...N25 | 0.8700  | 1.9900    | 2.855(3)  | 174         |

**Table S6.** Bond lengths for **2**.

| Parameter | Bond length (Å) | Parameter | Bond length (Å) |
|-----------|-----------------|-----------|-----------------|
| Al1-O1W   | 1.878(2)        | N1-N2     | 1.315(4)        |

|          |          |           |          |
|----------|----------|-----------|----------|
| A11-O2W  | 1.881(2) | N1-N5     | 1.313(4) |
| A11-O3W  | 1.856(2) | N3-N2     | 1.308(4) |
| A11-O4W  | 1.899(2) | N3-N4     | 1.316(4) |
| A11-O5W  | 1.881(2) | N4-N5     | 1.315(4) |
| A11-O6W  | 1.871(2) | N6-N7     | 1.326(3) |
| A12-O10W | 1.890(2) | N6-N10    | 1.329(4) |
| A12-O11W | 1.851(2) | N7-N8     | 1.318(3) |
| A12-O12W | 1.877(2) | N8-N9     | 1.313(3) |
| A12-O8W  | 1.877(2) | N9-N10    | 1.320(3) |
| A12-O9W  | 1.868(2) | O13W-H13B | 0.8500   |
| A12-O7W  | 1.898(2) | O13W-H13A | 0.8600   |

**Table S7. Bond angles for 2.**

| Parameter      | Bond angle (°) | Parameter   | Bond angle (°) |
|----------------|----------------|-------------|----------------|
| O1W-A11-O2W    | 91.30(9)       | N2-N1-N5    | 107.6(2)       |
| O1W- A11-O3W   | 89.66(10)      | N1-N2-N3    | 108.4(2)       |
| O1W- A11-O4W   | 178.92(10)     | N2-N3-N4    | 108.0(3)       |
| O1W- A11-O5W   | 88.88(9)       | N3-N4-N5    | 107.8(3)       |
| O1W- A11-O6W   | 90.09(10)      | N1-N5-N4    | 108.2(3)       |
| O7W- A12-O8W   | 90.34(9)       | N11-N15-N14 | 107.5(3)       |
| O7W- A12-O9W   | 89.42(10)      | N13-N14-N15 | 108.7(3)       |
| O7W- A12-O10W  | 89.24(9)       | N12-N13-N14 | 107.7(3)       |
| O7W- A12-O11W  | 91.06(10)      | N11-N12-N13 | 108.9(3)       |
| O7W- A12-O12W  | 178.70(10)     | N12-N11-N15 | 107.2(3)       |
| H12A-O12W-H12B | 110.00         | N22-N21-N25 | 108.0(2)       |
| H11A-O11W-H11B | 108.00         | N21-N22-N23 | 107.9(2)       |
| A12-O12W-H12B  | 124.00         | N22-N23-N24 | 108.3(2)       |

**Table S8. Torsion angles for 2.**

| Parameter | Torsion angle (°) | Parameter | Torsion angle (°) |
|-----------|-------------------|-----------|-------------------|
|-----------|-------------------|-----------|-------------------|

|                 |         |                 |         |
|-----------------|---------|-----------------|---------|
| N5-N1-N2-N3     | 0.5(4)  | N11-N12-N13-N14 | 0.4(4)  |
| N2-N1-N5-N4     | -0.5(4) | N12-N13-N14-N15 | 0.0(4)  |
| N1-N2-N3-N4     | -0.4(4) | N25-N21-N22-N23 | -0.3(3) |
| N2-N3-N4-N5     | 0.0(4)  | N22-N21-N25-N24 | 0.5(3)  |
| N15-N11-N12-N13 | -0.6(4) | N21-N22-N23-N24 | 0.1(3)  |
| N12-N11-N15-N14 | 0.6(4)  | N22-N23-N24-N25 | 0.3(3)  |

**Table S9.** Hydrogen bonds for **2**.

| D-H...A          | D-H (Å) | H...A (Å) | D...A (Å) | D-H...A (°) |
|------------------|---------|-----------|-----------|-------------|
| O1W-H1WB...O30W  | 0.8600  | 1.7200    | 2.572(3)  | 175         |
| O1W-H1WA...N10   | 0.8700  | 1.8900    | 2.735(3)  | 164         |
| O2W-H2WA...O18W  | 0.8700  | 1.8500    | 2.675(3)  | 156         |
| O2W-H2WB...O24W  | 0.8700  | 1.8800    | 2.691(3)  | 154         |
| O3W-H3WA...O20W  | 0.8600  | 1.8100    | 2.643(3)  | 160         |
| O3W-H3WB...O15W  | 0.8600  | 1.6800    | 2.514(4)  | 162         |
| O20W-H20B...N1   | 0.8600  | 1.9600    | 2.820(3)  | 177         |
| O21W-H21B...N2   | 0.8500  | 2.0000    | 2.819(3)  | 162         |
| O23W-H23B...N15  | 0.8500  | 1.9800    | 2.814(4)  | 164         |
| O28W-H28B...O19W | 0.8400  | 1.9000    | 2.753(3)  | 175         |
| O28W-H28B...O19W | 0.8400  | 1.9000    | 2.740(3)  | 176         |
| O29W-H29A...N3   | 0.8700  | 1.9500    | 2.808(4)  | 165         |
| O30W-H30B...O21W | 0.8800  | 1.9500    | 2.826(4)  | 170         |

### 3. IR Spectra

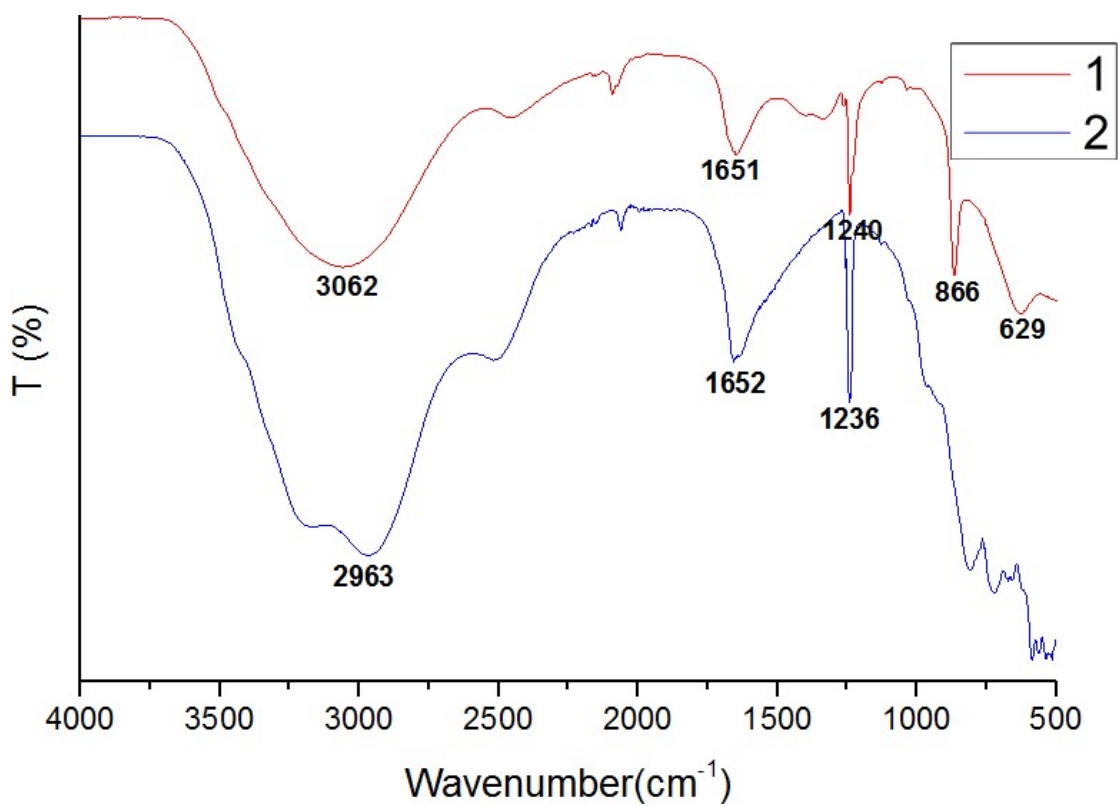

Figure S1. IR spectra for 1 and 2.



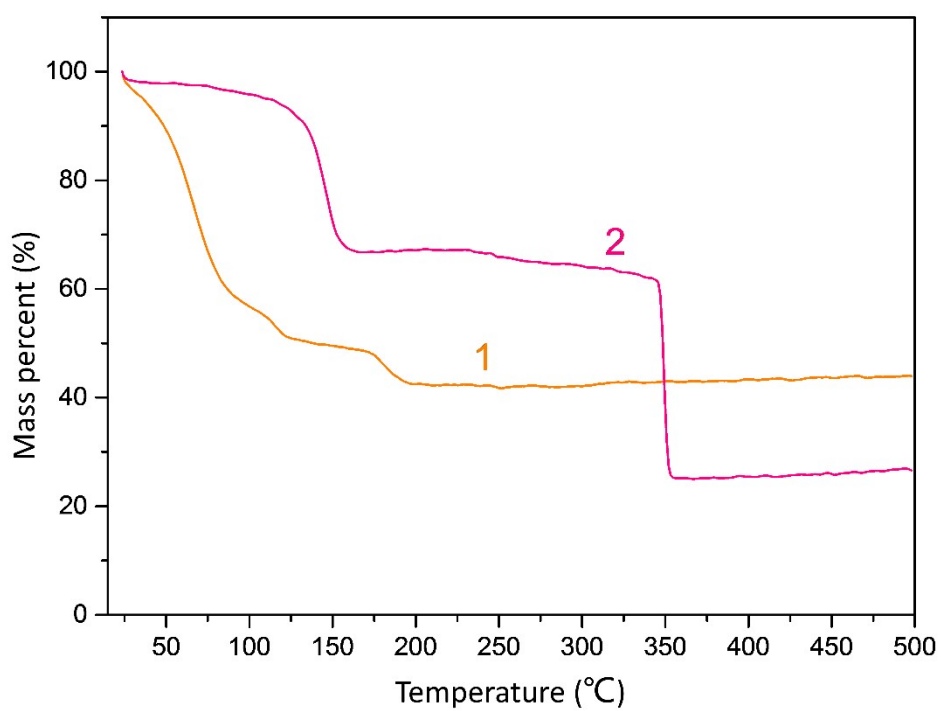

#### 4. Thermal analysis

**Figure S2.** TG curves of **1** and **2**. The plots were recorded with a heating rate of 5 °C min<sup>-1</sup>.

## 5. Mass spectra

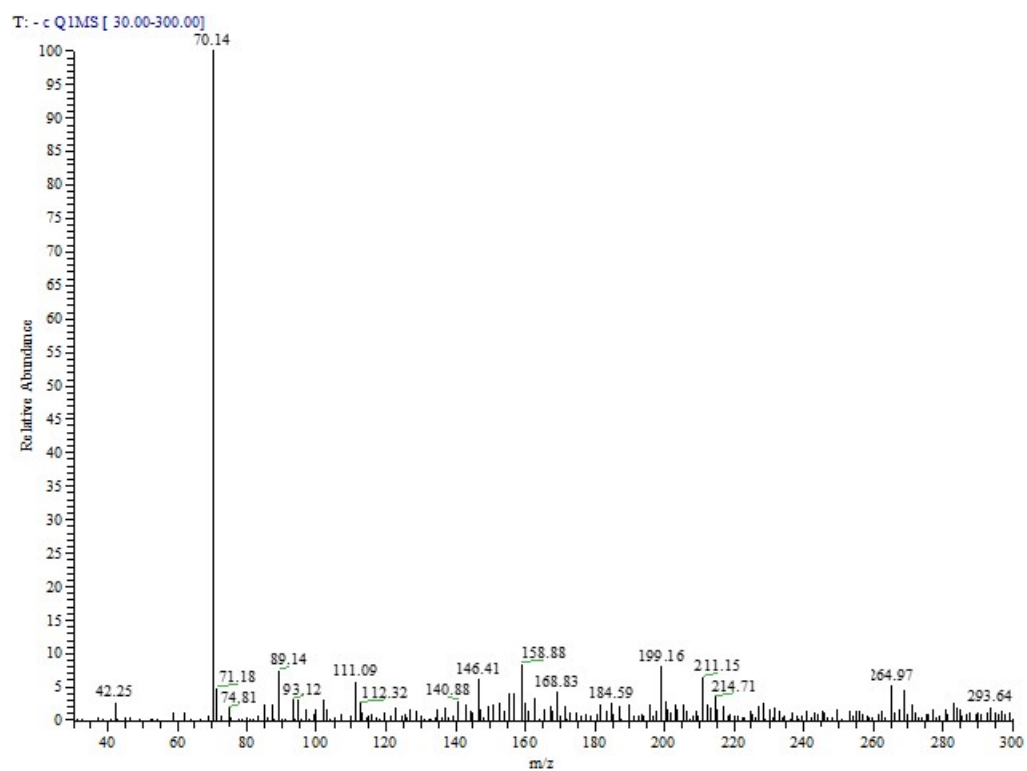

Figure S3. Mass spectra of 1.

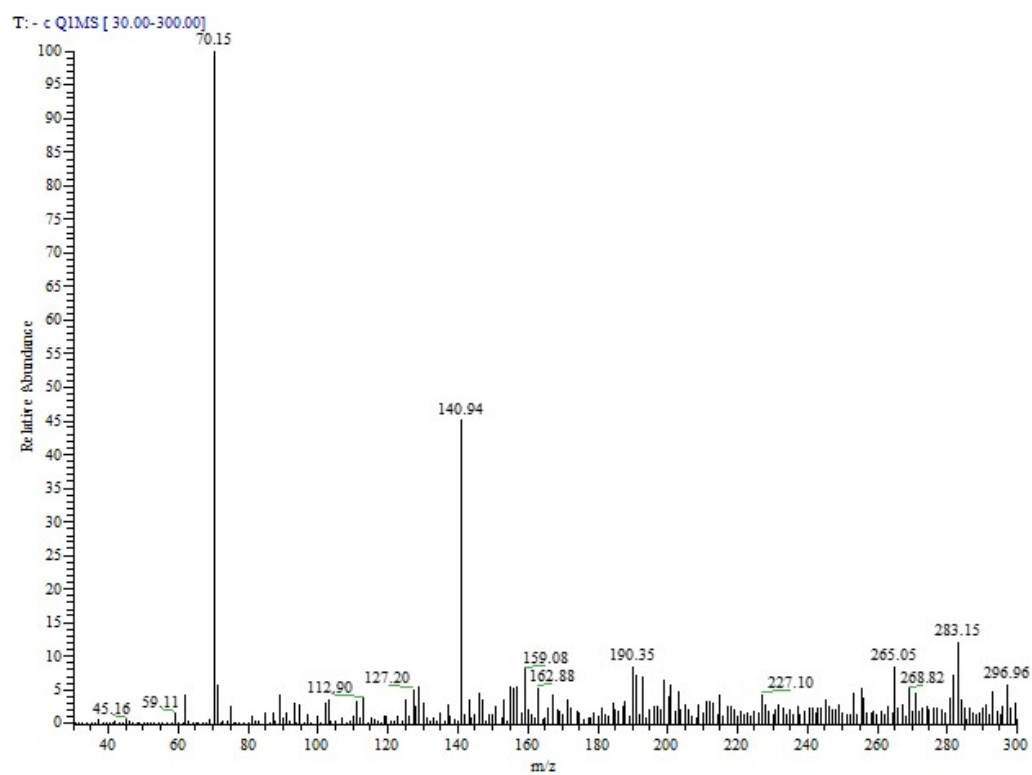

Figure S4. Mass spectra of 2.

## References

1. Sheldrick, G., Crystal structure refinement with SHELXL. *Acta Crystallographica Section C* **2015**, *71* (1), 3-8.
2. Dolomanov, O. V.; Bourhis, L. J.; Gildea, R. J.; Howard, J. A. K.; Puschmann, H., OLEX2: a complete structure solution, refinement and analysis program. *J. Appl. Crystallogr.* **2009**, *42* (2), 339-341.
3. Bourhis, L. J.; Dolomanov, O. V.; Gildea, R. J.; Howard, J. A. K.; Puschmann, H., The anatomy of a comprehensive constrained, restrained refinement program for the modern computing environment - Olex2 dissected. *Acta Crystallographica Section A* **2015**, *71* (1), 59-75.
